# Supplementary material for: Discrimination between Complete versus Non-Complete Pathologic Response to Neoadjuvant Therapy Using Ultrasensitive Mutation Analysis: A Proof-of-Concept Study in BRCA1-Driven Breast Cancer Patients
Source: MDPI journal article supplement (doi:10.3390/ijms24031870), 2023-01-18
Supplement: s1 [file s1]

**Supplementary Table S1.** Clinical description of the NACT patients

| Clinical characteristics                  | Non-carriers<br>(n = 204) | BRCA1 carriers<br>(n = 25) | Total<br>(n = 229) |
|-------------------------------------------|---------------------------|----------------------------|--------------------|
| Mean age (range)                          | 55.6 (26-89)              | 49.2 (28-76)               | 54.9 (26-89)       |
| <b>Clinical tumor stage</b>               |                           |                            |                    |
| T1-2                                      | 103 (50.5%)               | 20 (80.0%)                 | 123 (53.7%)        |
| T3-4                                      | 101 (49.5%)               | 5 (20.0%)                  | 106 (46.3%)        |
| <b>Clinical nodal stage</b>               |                           |                            |                    |
| N0                                        | 32 (15.7%)                | 7 (28.0%)                  | 39 (17.0%)         |
| N1-3                                      | 172 (84.3%)               | 18 (72.0%)                 | 190 (83.0%)        |
| <b>Histology</b>                          |                           |                            |                    |
| Invasive ductal carcinoma                 | 202 (99.0%)               | 25 (100%)                  | 227 (99.1%)        |
| Medullary carcinoma                       | 2 (1.0%)                  | 0 (0)                      | 2 (0.9%)           |
| <b>Subtype</b>                            |                           |                            |                    |
| Luminal A                                 | 40 (19.6%)                | 0 (0)                      | 40 (17.5%)         |
| Luminal B                                 | 90 (44.1%)                | 4 (16.0%)                  | 94 (41.0%)         |
| HER2                                      | 35 (17.2%)                | 0 (0)                      | 35 (15.3%)         |
| Triple-negative                           | 39 (19.1%)                | 21 (84.0%)                 | 60 (26.2%)         |
| <b>Number of NACT cycles</b>              |                           |                            |                    |
| Median                                    | 6                         | 4                          | 6                  |
| Range                                     | 2-16                      | 2-8                        | 2-16               |
| <b>Chemotherapy type</b>                  |                           |                            |                    |
| Platinum-containing schemes               | 19 (9.3%)                 | 18 (72.0%)                 | 37 (16.2%)         |
| Taxanes + platinum                        | 15 (7.4%)                 | 9 (36.0%)                  | 24 (10.5%)         |
| Platinum monotherapy                      | 1 (0.5%)                  | 8 (32.0%)                  | 9 (3.9%)           |
| Taxanes + platinum + anthracyclines       | 3 (1.5%)                  | 1 (4.0%)                   | 4 (1.7%)           |
| Non-platinum regimens                     | 185 (90.7%)               | 7 (28.0%)                  | 192 (83.8%)        |
| Taxanes + anthracyclines                  | 79 (38.7%)                | 3 (12.0%)                  | 82 (35.8%)         |
| Anthracyclines without taxanes            | 69 (33.8%)                | 4 (16.0%)                  | 73 (31.9%)         |
| Taxane monotherapy                        | 12 (5.9%)                 | 0 (0)                      | 12 (5.2%)          |
| Other                                     | 25 (12.3%)                | 0 (0)                      | 25 (10.9%)         |
| <b>RECIST 1.1</b>                         | <b>(n = 189)</b>          | <b>(n = 19)</b>            | <b>(n = 208)</b>   |
| CR                                        | 4 (2.1%)                  | 2 (10.5%)                  | 6 (2.9%)           |
| PR                                        | 113 (59.8%)               | 14 (73.7%)                 | 127 (61.0%)        |
| SD                                        | 67 (35.4%)                | 3 (15.8%)                  | 70 (33.6%)         |
| PD                                        | 5 (2.6%)                  | 0 (0)                      | 5 (2.4%)           |
| <b>Pathologic complete response (pCR)</b> | <b>(n = 192)</b>          | <b>(n = 24)</b>            | <b>(n = 216)</b>   |
| Yes                                       | 29 (15.1%)                | 13 (54.2%)                 | 42 (19.4%)         |
| No                                        | 163 (84.9%)               | 11 (45.8%)                 | 174 (80.6%)        |
| <b>Miller-Payne score</b>                 | <b>(n = 141)</b>          | <b>(n = 21)</b>            | <b>(n = 162)</b>   |
| 1                                         | 22 (16.2%)                | 1 (4.8%)                   | 23 (14.2%)         |
| 2                                         | 47 (32.3%)                | 4 (19.0%)                  | 51 (31.5%)         |
| 3                                         | 28 (20.8%)                | 4 (19.0%)                  | 32 (19.8%)         |
| 4                                         | 22 (14.6%)                | 1 (4.8%)                   | 23 (14.2%)         |
| 5                                         | 22 (16.2%)                | 11 (52.4%)                 | 33 (20.4%)         |

**Supplementary Table S2.** Primers and probes used for *TP53* ddPCR

| <b>Mutation</b>              | <b>Sequence 5'→3'</b>               |
|------------------------------|-------------------------------------|
| <b>R213X [c.637C&gt;T]</b>   |                                     |
| F                            | GGAAATTTGCGTGTGGAGTAT               |
| R                            | CAGGCGGCTCATAGGGCA                  |
| P wt                         | [R6G]CACTATGTGCGAAAAGTGTTTCTG[BHQ1] |
| P mut                        | [FAM]CACTATGTCAAAAAGTGTTTCTG[BHQ1]  |
| <b>I255N [c.764T&gt;A]</b>   |                                     |
| F                            | ACATGTGTAACAGTTCCTGC                |
| R                            | CAAGTGGCTCCTGACCTG                  |
| P wt                         | [R6G]TCCTCACCATCATCACACTG[BHQ1]     |
| P mut                        | [FAM]TCCTCACCATCAACACACTG[BHQ1]     |
| <b>Y234C [c.701A&gt;G]</b>   |                                     |
| F                            | CTAGGTTGGCTCTGACTGTA                |
| R                            | GGATGGGCCTCCGGTTCA                  |
| P wt                         | [R6G]CCACCATCCACTACAACTACAT[BHQ1]   |
| P mut                        | [FAM]CCACCATCCACTGCAACTACAT[BHQ1]   |
| <b>M237I [c.711G&gt;A]</b>   |                                     |
| F                            | CTAGGTTGGCTCTGACTGTA                |
| R                            | TGGCAAGTGGCTCCTGAC                  |
| P wt                         | [FAM]ACTACATGTGTAACAGTTCCTGC[BHQ1]  |
| P mut                        | [R6G]ACTACATATGTAACAGTTCCTGC[BHQ1]  |
| <b>Y220C [c.659A&gt;G]</b>   |                                     |
| F                            | TGGAGAGACGACAGGGCT                  |
| R                            | TCCCAGAGACCCCAAGTTG                 |
| P wt                         | [FAM]TGGTGCCCTATGAGCCGCCTGAG[BHQ1]  |
| P mut                        | [R6G]TGGTGCCCTGTGAGCCGCCTGAG[BHQ1]  |
| <b>R273L [c.818G&gt;T]</b>   |                                     |
| F                            | TAATCTACTGGGACGGAACA                |
| R                            | TCCTCTGTGCGCCGGTCT                  |
| P wt                         | [FAM]CACAAACACGCACCTCAAAGC[BHQ1]    |
| P mut                        | [R6G]CACAAACAAGCACCTCAAAGC[BHQ1]    |
| <b>R273H [c.818G&gt;A]</b>   |                                     |
| F                            | TAATCTACTGGGACGGAACA                |
| R                            | TCCTCTGTGCGCCGGTCT                  |
| P wt                         | [FAM]CACAAACACGCACCTCAAAGC[BHQ1]    |
| P mut                        | [R6G]CACAAACATGCACCTCAAAGC[BHQ1]    |
| <b>S149fs*21 [c.445delT]</b> |                                     |
| F                            | CAAGACCTGCCCTGTGC                   |
| R                            | TGCTGTGACTGCTTGTAAGA                |
| P wt                         | [R6G]T+GTGG+AA+TC+AA+CC[BHQ1]*      |
| P mut                        | [FAM]T+G+TGG+ATC+AA+CC[BHQ1]*       |

\*Probes with LNA bases
